# Supplementary material for: In lupus nephritis, specific in situ inflammatory states are associated with refractory disease and progression to renal failure
Source: bioRxiv or medRxiv preprint supplement (doi:10.1101/2021.09.03.458909), 2021-09-16
Supplement: Supplementary file [file media-1.pdf]

## Supplementary Figures and Tables

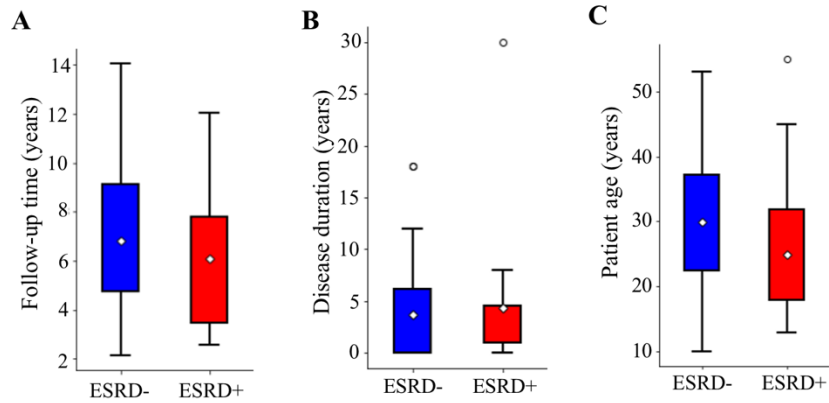

**Supplementary Figure 1. Clinical characteristics of patient cohort.** ESRD+ and ESRD- patients did not differ in A) Duration of follow up period ( $p=0.678$ ), B) Disease duration ( $p=0.819$ ), or C) Patient age ( $p=0.096$ ). (Mann-Whitney U Test with Bonferroni correction for multiple comparisons).

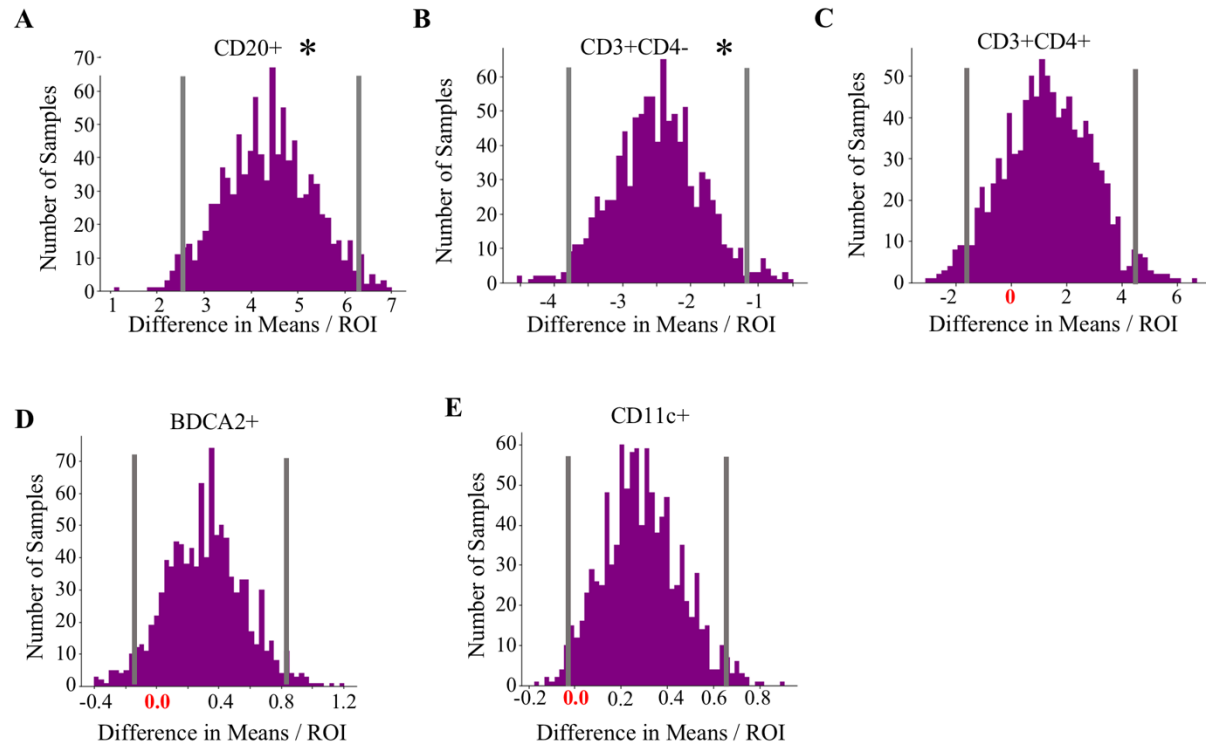

**Supplementary Figure 2. Distribution of the difference in means for indicated cells/ROI comparing ESRD+ vs ESRD-.** Difference in means for all iterations of bootstrapping are shown for A) CD20+, B) CD3+CD4-, C) CD3+CD4+. D) CD11c+, E) BDCA2+ cells. Vertical grey lines denote 95% confidence intervals, stars denote the confidence intervals that do not overlap with zero.

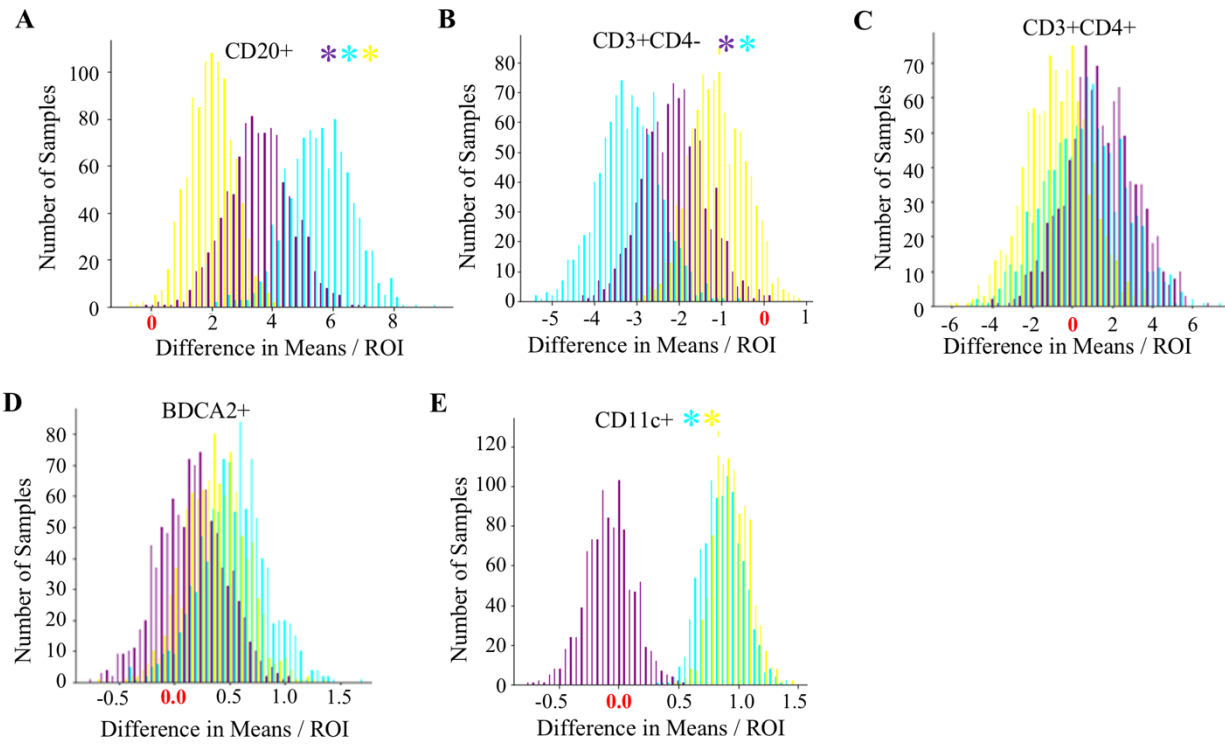

**Supplementary Figure 3. Distribution of the difference in means for indicated cells.** Difference in means for each bootstrapping iteration comparing ESRD+ vs ESRD- (purple), ESRD+ vs ESRD current (cyan), and ESRD- vs current (yellow) for A) CD20+, B) CD3+CD4-, C) CD3+CD4+. D) CD11c+, E) BDCA2+ cells. Stars denote the confidence intervals that do not overlap with zero, colors correspond with the comparison.

A

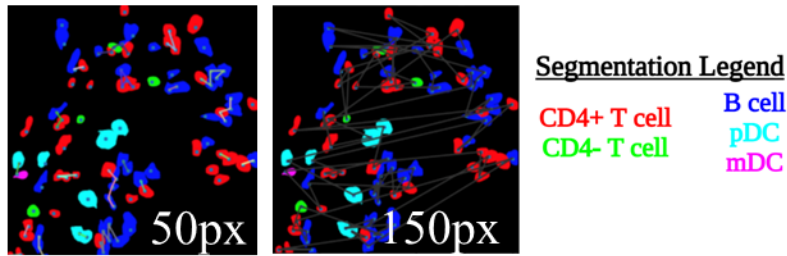

B

|                                                                                                                                                                                                             |                                                                                                                                                                                                                                                                                                                                                                                                                                                                         |
|-------------------------------------------------------------------------------------------------------------------------------------------------------------------------------------------------------------|-------------------------------------------------------------------------------------------------------------------------------------------------------------------------------------------------------------------------------------------------------------------------------------------------------------------------------------------------------------------------------------------------------------------------------------------------------------------------|
| <p>Cell Frequencies</p> <ul style="list-style-type: none"> <li>B cell count</li> <li>CD4- T cell count</li> <li>CD4+ T cell count</li> <li>mDC count</li> <li>pDC count</li> </ul>                          | <p>Cell Frequency Ratios</p> <ul style="list-style-type: none"> <li>B cell count / CD4- T cell count</li> <li>B cell count / CD4+ T cell count</li> <li>B cell count / mDC count</li> <li>B cell count / pDC count</li> <li>mDC count / CD4- T cell count</li> <li>mDC count / CD4+ T cell count</li> <li>mDC count / pDC count</li> <li>pDC count / CD4- T cell count</li> <li>pDC count / CD4+ T cell count</li> <li>CD4- T cell count / CD4+ T cell count</li> </ul> |
| <p>Cell Proportions</p> <ul style="list-style-type: none"> <li>B cell proportion</li> <li>CD4- T cell proportion</li> <li>CD4+ T cell proportion</li> <li>mDC proportion</li> <li>pDC proportion</li> </ul> |                                                                                                                                                                                                                                                                                                                                                                                                                                                                         |
| <p>Neighborhood Shape Features</p> <ul style="list-style-type: none"> <li>Neighborhood area</li> </ul>                                                                                                      | <p>Cell Shape Features</p> <ul style="list-style-type: none"> <li>Mean circularity</li> <li>Mean eccentricity</li> <li>Mean major/minor axis ratio</li> </ul>                                                                                                                                                                                                                                                                                                           |

C

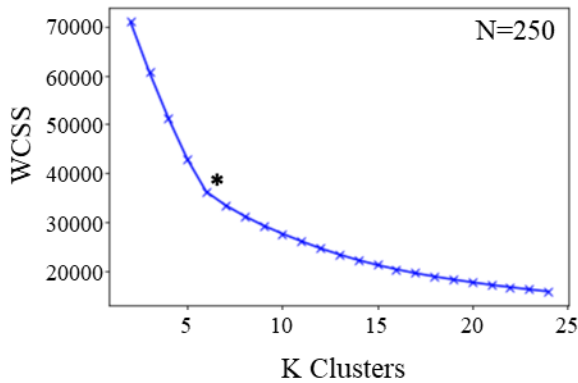

D

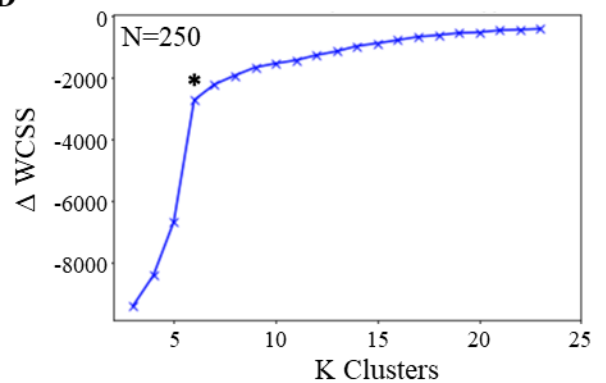

**Supplementary Figure 4. Definition of cell neighborhoods in the HR dataset.** A) Representative outputs of DBSCAN algorithm with varying distance cutoffs (50, 100, and 150 pixels), B) 24 features used to define types of aggregates, results of bootstrapping method for determination of optimal cluster number using C) within cluster sum of distances squared (WCSS) and D) delta WCSS. The optimal cluster hyperparameter used for downstream analyses ( $k = 6$ ), is denoted by an asterisk.

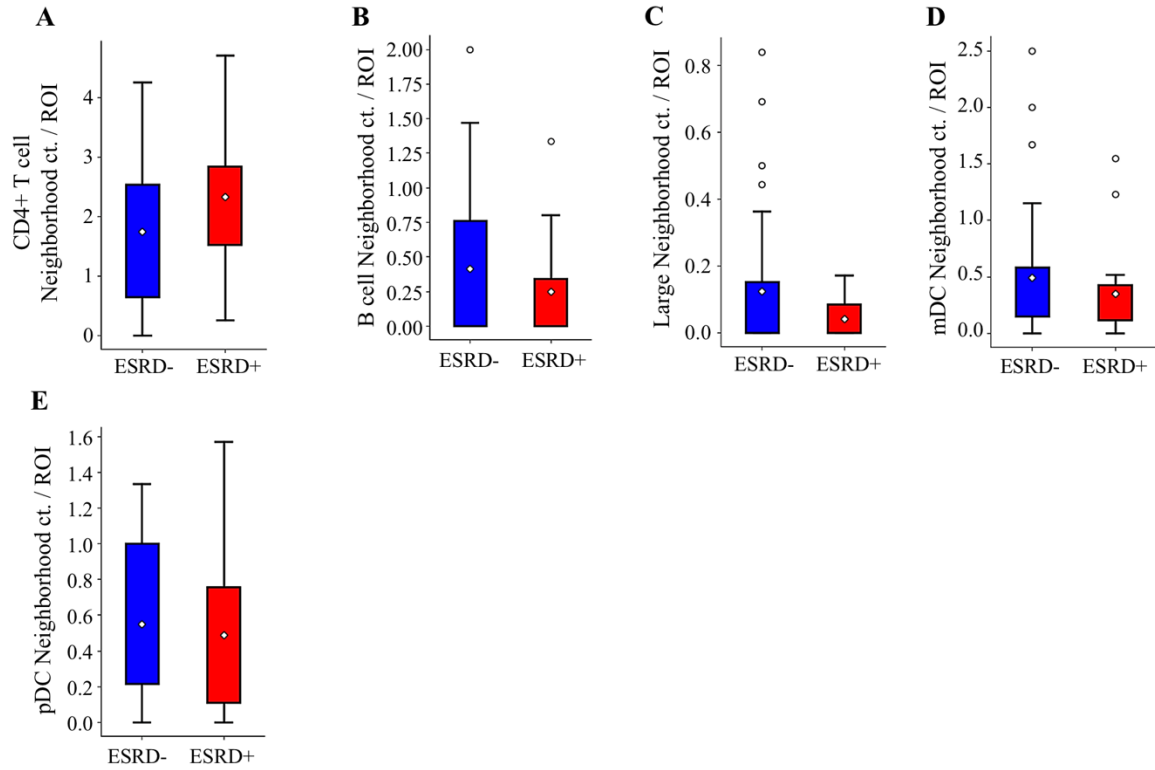

**Supplementary Figure 5. Other cellular neighborhoods not associated with renal failure.** The abundance of neighborhoods between the patient cohorts, normalized by the number of ROIs per patient, is compared by Mann-Whitney U Test, with a Bonferroni correction for A) CD4+ T cell neighborhoods, B) B cell neighborhoods, C) Large neighborhoods, D) mDC neighborhoods, E) pDC neighborhoods

**A**

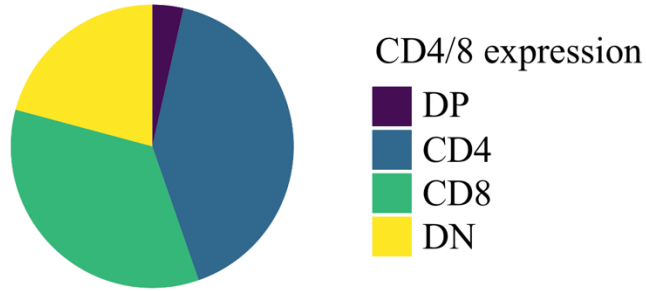

**B**

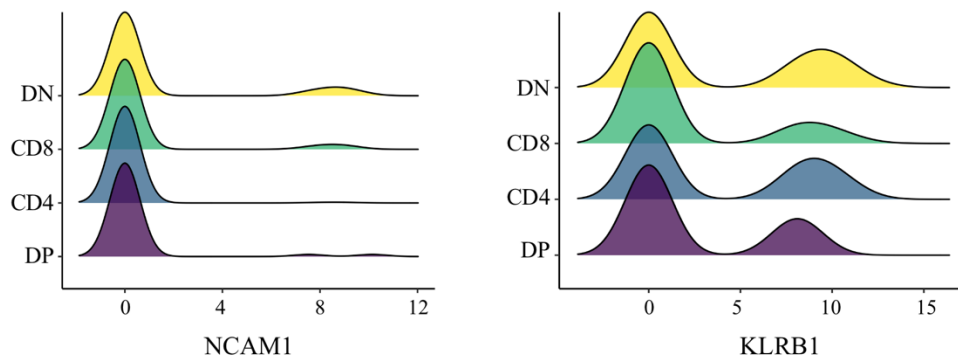

**Supplementary Figure 6. DN T cells are found in scRNA-Seq LN data.** A) Distribution of *CD4/8A/8B* expression in T cell population. DP: double-positive, DN: double-negative; B) Density plots showing distribution of *NCAM1* and *KLRB1* expression.

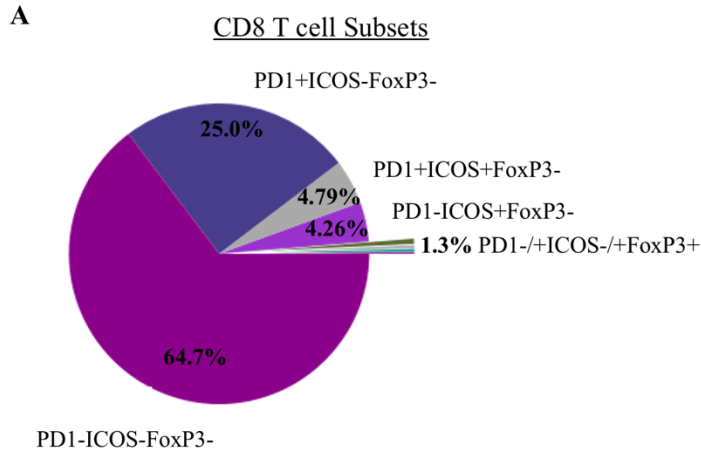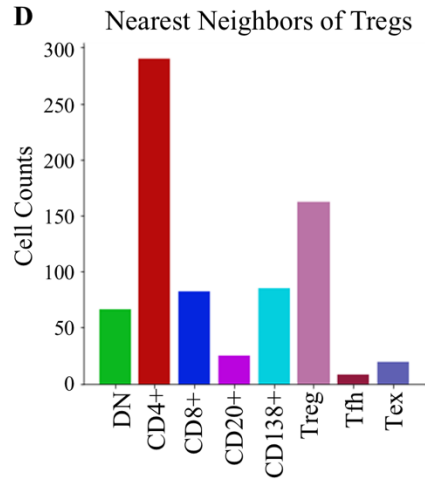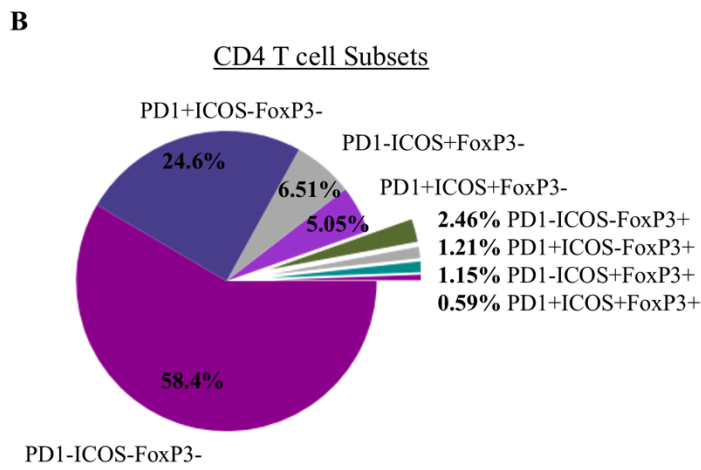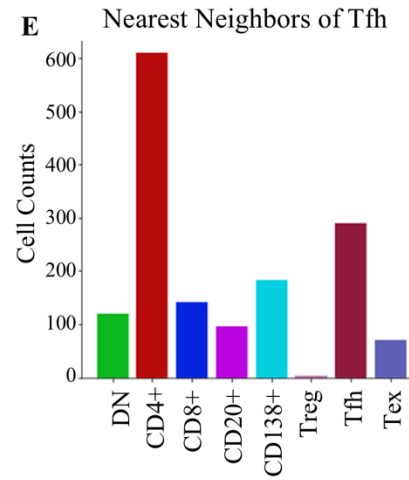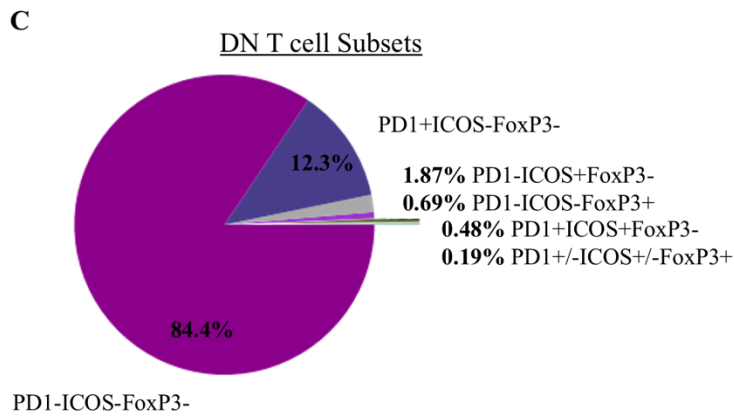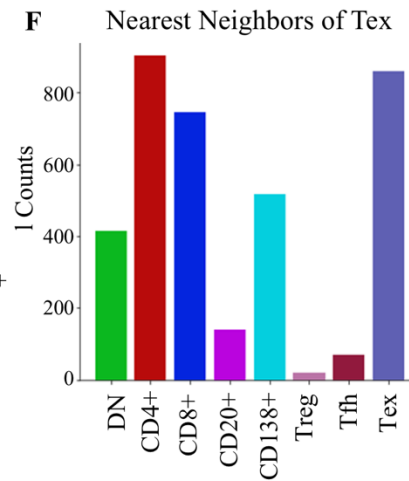

**Supplementary Figure 7. CD8, CD4, and DN T cell phenotypes in LN.** Distribution of secondary marker (ICOS, PD1, FoxP3) expression in A) CD8+, B) CD4+ and C) DN T cells, Distribution of nearest neighbors of D) Treg (CD3+CD4+PD1-ICOS-FoxP3+) cells, E) Tfh (CD3+CD4+PD1+ICOS+/-FoxP3+) cells, and F) Tex (CD3+CD4+PD1+ICOS-FoxP3-).



**Supplemental Table 1. Select clinical feature from patients in the HR dataset.** (Table attached as an excel sheet)

**Supplemental Table 2. Reagents for sample staining.** Anti-CD20(Agilent, M0755), anti-CD4(Abcam, ab133616), anti-CD3(BIO-RAD, MCA1477), anti-BDCA2(R&D, AF1376), and anti-CD11c (Abcam, ab52632) were applied for high-resolution images. For high-dimensional images, more antibodies were added, including anti-CD8(Abcam, ab17147), anti-ICOS(Abcam, ab105227), anti-PD1(Abcam, ab52587), anti-Foxp3(Invitrogen, 14-4776-82), anti-CD138(Invitrogen, MA5-12400), anti-MX1(R&D, AF7946), and anti-TCR $\delta$ (Santa Cruz, sc-100289). DAPI (Invitrogen, H3570) was used for nuclear staining.

| <b>Target</b> | <b>Vendor</b> | <b>Catalog#</b> |
|---------------|---------------|-----------------|
| CD20          | Agilent       | M0755           |
| CD4           | Abcam         | ab133616        |
| CD3           | BIO-RAD       | MCA1477         |
| BDCA2         | R&D           | AF1376          |
| CD11c         | Abcam         | ab52632         |
| CD8           | Abcam         | ab17147         |
| ICOS          | Abcam         | ab105227        |
| PD1           | Abcam         | ab52587         |
| FoxP3         | Invitrogen    | 14-4776-82      |
| CD138         | Invitrogen    | MA5-12400       |
| MX1           | R&D           | AF7946          |
| TCR $\delta$  | Santa Cruz    | sc-100289       |
| DAPI          | Invitrogen    | H3570           |
